# Supplementary material for: Transcriptome Analysis and Discovery of Genes Relevant to Development in Bradysia odoriphaga at Three Developmental Stages
Source: PubMed Central journal article supplement (PMC4759360; doi:10.1371/journal.pone.0146812), 2016-02-18
Supplement: pone.0146812.s009.pdf [file pone.0146812.s009.pdf]

**Table S1 Primer sequence and fragment length of genes for RT-PCR**

| Genes  | Primer sequence (5'- 3')                              | Fragment length (bp) |
|--------|-------------------------------------------------------|----------------------|
| c24076 | F: AACCCCTCGTTGCTGAGACTG<br>R: AGCCATTCCCTTGTTGACTG   | 270                  |
| c31255 | F: AAATGCGAATCAATGCACAG<br>R: TCCACCTCCACTGCCTTTAC    | 304                  |
| c15787 | F: ACCAATGCCAACGACAAAT<br>R: ACAAGCCGAGTGGGTGTAAT     | 300                  |
| c22126 | F: AATGCTTGTGGCTCTGTCGT<br>R: GTGGCTGGGTGGAATGAAT     | 284                  |
| c23128 | F: CATCCTGCTGCTCTTTCACA<br>R: ACTGTTTTCTGGTCCCTCTCC   | 311                  |
| c29314 | F: GATTGGGTGTGGATTGTTCC<br>R: CGCATTGGTTCGTGTTCTTA    | 298                  |
| c30388 | F: TACGACAATGCTGCCGATAA<br>R: GCGACTGACGATGATAAAAAGG  | 323                  |
| c10499 | F: TTCACCAGGCAACAACAGAC<br>R: ACCAAAGACAAGCGGAAAAG    | 304                  |
| c11110 | F: CTCCTCAAATCCCCTCCAG<br>R: AGCCAGTTCCTCCAATGCT      | 297                  |
| c28873 | F: ATCTCAGCGAAGCAACCATT<br>R: TTCATACCATCCCCAAAGGA    | 328                  |
| c11649 | F: TATTCACACCAACGGTCCAA<br>R: TATCACCACCCATCCATTCA    | 257                  |
| c11748 | F: GGGAACGGACAAGAATACCA<br>R: CCCTCACGAACCAACAAAAT    | 336                  |
| c12361 | F: AGCTGCGGAGATGGTTCA<br>R: TTGGTTATTGACAGCGTGGA      | 246                  |
| c14093 | F: CTGCGAAACGGTAATGAACC<br>R: GGGTGGACAGGAACTCACTC    | 265                  |
| c15398 | F: TTTGTATGGATGTGGTGACAGA<br>R: GTCCCGAGCGATTCTTGA    | 227                  |
| c15420 | F: TCCGCTTGTGATTGTTGAAG<br>R: AGTCGCGCACGTAAAACATT    | 303                  |
| c15931 | F: TGGAGCAAGCGTAAAACCTCA<br>R: TGAACCGTCTAACCAAACCTCC | 298                  |
| c16124 | F: CCAGGCAACTTTATCGCAGT<br>R: TGTCCAACAAGGTCATTTCG    | 290                  |
| c16652 | F: AGGTGGACGAGGGTGTAGAG<br>R: TTTGTTGGTGTGACTGTAGGC   | 299                  |
| c17315 | F: GCATCATCTCGGACTGTGAA<br>R: CGCATCTTGTGTTTCTGGTC    | 357                  |

|        |                                                        |     |
|--------|--------------------------------------------------------|-----|
| c18264 | F: CGGTTTTCCGTCTATCTCTCC<br>R: ATTATCTGTGAAGCAGCAATGG  | 333 |
| c19009 | F: CTATGATTGTGCCGATGGTG<br>R: TGGAAGAAGCCAGCAGTTTAT    | 308 |
| c19179 | F: CGCTGGCTGTTGTTAGGAG<br>R: CGCACTTGGAACGATACTG       | 296 |
| c19361 | F: TCCAGCCCTTCGTTACTACAA<br>R: CCACCGAGCAATCTCTTAGC    | 285 |
| c19381 | F: TCTGGTGTCGTTACAAAGG<br>R: ATGGCAGTCCAAGACGCTAC      | 296 |
| c20839 | F: ATGGAACACTGGGAAAATCG<br>R: TCGGACATAGCAAAAGAATGC    | 316 |
| c20905 | F: ATGGTCAACGACACAGCACT<br>R: GGAAAAATGGAACCGTCAAA     | 330 |
| c21426 | F: GGAAAATCCGTTGTGTTTCGT<br>R: TAACTCCGTCAGCCCAAAT     | 287 |
| c21548 | F: CCAAGCGTATTCTCATCCACT<br>R: GGGCACAGTTCAGTTTCTCTC   | 349 |
| c22526 | F: TGTCGGAAATAGATGATGTTTCG<br>R: TCCCAGATTTCGTTTTGAAGC | 292 |
| c22953 | F: ACTCAAACCGCACTTGGCTA<br>R: ATTGCTTACCGTTCCATTCG     | 323 |
| c24446 | F: TGCGTTTCTGGTGTCTGATT<br>R: TCATTCGTCTGCTTTCCTGA     | 308 |
| c24628 | F: GACTGGAAGCAATCCTCGTC<br>R: TGTGCGATACTGAGCGTTTC     | 313 |
| c24808 | F: AGGACTGTATCCGCCGTAAT<br>R: GAATGGTTGCCGCTTATTTT     | 318 |
| c26169 | F: CAGCCGATAAAAATCCCGTA<br>R: ACAAGGGCAAGTCAATGTCC     | 305 |
| c26376 | F: TGGCGTTGATGCTAACTGAA<br>R: AAAGCGGGTAGTGTGACTGG     | 283 |
| c26581 | F: CAGGAAACGAGACGGATTGT<br>R: ATGCCCCGAGTAAGGCTATC     | 317 |
| c27111 | F: CGTCAGCATCACAAATCCAT<br>R: GCAGTGGCAAAAGAGGAAAA     | 313 |
| c27263 | F: GATTTGATGTTCCGCCGTTG<br>R: CATTTGGTGGTGTGGATTTC     | 295 |
| c27821 | F: ATACCAATGCGGAAGAGACG<br>R: CCAGTCAACGGCAAAGAAAT     | 272 |
| c30916 | F: TTCAGCCACAGCGACTACAC<br>R: TCTCCGACCACTCACAAACA     | 290 |
| c31983 | F: GACCAAATGTCTCCATCCGTA<br>R: GGACCCTCAAGCAAACACA     | 267 |

|       |                                                    |     |
|-------|----------------------------------------------------|-----|
| c4936 | F: GTCTTGTTGCGGGTCAATCT<br>R: GTCACACCACACTTGGAACG | 218 |
| c8174 | F: TTGTTCCGCACCTTCCAC<br>R: GTTTTCAATGGGCTTCGGTA   | 305 |
| c9832 | F: TTCTCTGCTTTTCCCTCAGC<br>R: AAGTGGACCGTTTCTGTGC  | 246 |

---
