# Supplementary material for: Transcriptome Analysis and Discovery of Genes Relevant to Development in Bradysia odoriphaga at Three Developmental Stages
Source: PubMed Central journal article supplement (PMC4759360; doi:10.1371/journal.pone.0146812), 2016-02-18
Supplement: pone.0146812.s010.pdf [file pone.0146812.s010.pdf]

**Table S2. Primer sequence of genes for qRT-PCR**

| Genes            | Primer sequence (5'- 3')                                 |
|------------------|----------------------------------------------------------|
| $\beta$ -actin   | F: CTGTCCACCTTCCAAACGAT<br>R: AACACAGAAGAAACGACACCA      |
| $\beta$ -tubulin | F: GAAGAAATGAAGACGTGGAA<br>R: ATGACGATGTCGGGAGTG         |
| c24076           | F: CGTCTAATGATGTGTTCGTTGC<br>R: TGTGCTTCAGGGAAATACTCTAAC |
| c31255           | F: GCAGGCGTAAATCAGAGTGG<br>R: TCAGGGACAATCCAGGTAAGA      |
| c15787           | F: CCAGGTCGTTTGTATTGTAGCA<br>R: ATTGCGTTC TTGGTGGATG     |
| c22126           | F: ACTTCGTT CAGCAGGTCACA<br>R: CGATGGATTGTTCCGGTCATA     |
| c23128           | F: AGGGTATGGCGAAGTGATTG<br>R: GTATGGGACCGCTGAGAGTG       |
| c29314           | F: TCACATCACGACTGCTTCG<br>R: TGC GGAAAGACTGTA ACTGC      |
| c30388           | F: CATTTC ACTTTGGCTGCGTA<br>R: AAACGGCTTTCAACTCTCCA      |
| c10499           | F: TTTATCGGGTGTCGGAGATG<br>R: GTC TGTGTTGCCTGGTGAA       |
| c11110           | F: CAACCCAGCAAACCAGAAGT<br>R: GATTCCCTCCACCGATTCCCTC     |
| c28873           | F: TCACGA ACTTGGCGTAACTG<br>R: GTC ATTTGGACGAACAGAAACA   |
| c11649           | F: CTTGTTCAGCGTGCGTAGTC<br>R: CTCCAATACCGAGTCCGATG       |
| c11748           | F: CGACACTTCCGCTTAGTCAA<br>R: ACACCACCCTCCACCATT         |
| c12361           | F: GGCCATCATATCTGGTCTTAATG<br>R: GCGTGGAAGAGAGCTTCAAT    |
| c14093           | F: CATCGGGTTCGGTGAGAAT<br>R: TGTCTTCGTCGCTGTTGAAA        |
| c15398           | F: TTTAGTTGTGTCCTTGCACCA<br>R: GCTTCAAACCGAAATCAACA      |
| c15420           | F: CTTC CGCTTGTGATTGTTGA<br>R: TGTGCTTCTATTATTGGCTGCT    |
| c15931           | F: CGAATGGACAACCGTAATCA<br>R: TGAACCGTCTAACC AA ACTCC    |
| c16124           | F: CGAAACGGCTCAAAGAGAAT<br>R: TGAACATTACCGCACTCCTG       |
| c16652           | F: TATGTGCCTGTGTGCGAATG<br>R: TCTTTCTGGCGTTGGCTTAT       |
| c17315           | F: CGGACTGTGAATCTGACTGG<br>R: CACTATGTTGACCGCAGGAT       |
| c18264           | F: CATGGCAGTGAATCGGAATA                                  |

|        |                            |
|--------|----------------------------|
|        | R: AGCAATGGGAATCGAAATGA    |
| c19009 | F: GATTATGTGGGAATGGTGTCTG  |
|        | R: TGACGAATACTGAATGGAATGC  |
| c19179 | F: TGAAGGAAGAATCCCGAATAG   |
|        | R: CTAAACGC ACTTGGAAACGA   |
| c19361 | F: GCCCAGAAAGCAATAGTCAAA   |
|        | R: AGCCACCAAGTCAACAAGGA    |
| c19381 | F: CCGATGCTGGATGTAGTTGA    |
|        | R: CTTGGTGTGGTGGATGTTTG    |
| c20839 | F: TTGTCACCATTATCCCACCA    |
|        | R: GTCTCCTACATTCGGGTCCA    |
| c20905 | F: GAAGTGATTTGATGGTTGGACA  |
|        | R: CCCGATTTGTTTATGAGAAGG   |
| c21426 | F: GCTCGTTATGGGCAACCA      |
|        | R: GTAGCACCTTTCAGCCAACA    |
| c21548 | F: CCGCCATTACA ACTTCGTTT   |
|        | R: GGATGAGAATACGCTTGGTG    |
| c22526 | F: GATTTCCACTGACCGAATGG    |
|        | R: TCAAACCGTCGTATGTCCAC    |
| c22953 | F: GCGGCATCTATTTCTGTG      |
|        | R: ACACTCAAGGGCTGGTATCG    |
| c24446 | F: AAATGGTTTCGGTACTTTCG    |
|        | R: GAATAAGGATAGTGCTGCGTGA  |
| c24628 | F: ACAGCGATTCTTTCCCAGAG    |
|        | R: TGTGCGATACTGAGCGTTTC    |
| c24808 | F: TCGCAGCATTGATTACCAGA    |
|        | R: GAACGGTGGAAAGGAAGTAGC   |
| c26169 | F: GGACATTGACTTGCCCTTGT    |
|        | R: GGAGTGGGTTGTGTTTGGTC    |
| c26376 | F: ATTTCTACCACGCTGCCACT    |
|        | R: CGCTTCTACTGCTGCCTACC    |
| c26581 | F: CAGGAAACGAGACGGATTGT    |
|        | R: ACTGGGCGAAACTGCTTAGT    |
| c27111 | F: GCCGACCCACCTACGATAA     |
|        | R: ATGGATTTGTGATGCTGACG    |
| c27263 | F: ACAATGCCAATCCACACATC    |
|        | R: CAACGGCGAACATCAAATC     |
| c27821 | F: AGTCGGAGAGTGTGGACGAG    |
|        | R: TCCCAGAGAATGACCCAGAA    |
| c30916 | F: GAAGCAGGAACCCACTACCA    |
|        | R: GATTTGCCAGCCCAC TTTC    |
| c31983 | F: CCCTGTTGTATGATTCGGAGA   |
|        | R: ACGGATGGAGACATTTGGTC    |
| c4936  | F: CACAAACGGCTGACAACG      |
|        | R: CGCCTCAACTTTCCTTACTTTCA |
| c8174  | F: TCCCGAATGTGGTATGTCTC    |
|        | R: CGGAAGATGTGCGAGTAACA    |
| c9832  | F: CGCATCATTTCTTGGACATC    |

R: AAAGTGGACCGTTTCTGTGC

---

1
