# Supplementary material for: Transcriptome Analysis and Discovery of Genes Relevant to Development in Bradysia odoriphaga at Three Developmental Stages
Source: PubMed Central journal article supplement (PMC4759360; doi:10.1371/journal.pone.0146812), 2016-02-18
Supplement: pone.0146812.s011.pdf [file pone.0146812.s011.pdf]

**Table S3. Regulated and annotated information of differentially expressed genes (DEGs) related to *Bradysia odoriphaga* development**

| Unigene ID | 3th vs 4th |           | 4th vs Pupa |           | 3th vs Pupa |           |
|------------|------------|-----------|-------------|-----------|-------------|-----------|
|            | log2FC     | Regulated | log2FC      | Regulated | log2FC      | Regulated |
| c4843      | -5.17      | down      | --          | --        | -5.97       | down      |
| c23897     | -7.09      | down      | --          | --        | -6.85       | down      |
| c33601     | 3.39       | up        | --          | --        | --          |           |
| c10244     | --         | --        | 2.86        | up        | 2.55        | up        |
| c20752     | --         | --        | 4.11        | up        | 4.64        | up        |
| c23801     | --         | --        | 3.58        | up        | 3.46        | up        |
| c26961     | --         | --        | 2.26        | up        | 2.90        | up        |
| c27681     | --         | --        | 3.31        | up        | 3.54        | up        |
| c28314     | --         | --        | 2.65        | up        | 3.52        | up        |
| c28746     | --         | --        | 3.09        | up        | 3.07        | up        |
| c30336     | --         | --        | 3.46        | up        | 3.43        | up        |
| c30501     | --         | --        | 3.78        | up        | 4.65        | up        |
| c30850     | --         | --        | 2.52        | up        | 2.54        | up        |
| c31327     | --         | --        | 2.64        | up        | 3.05        | up        |
| c4206      | --         | --        | --          | --        | -4.35       | down      |
| c15127     | --         | --        | --          | --        | 2.18        | up        |
| c22888     | --         | --        | --          | --        | 4.02        | up        |
| c22990     | --         | --        | --          | --        | 2.50        | up        |
| c24932     | --         | --        | --          | --        | -3.75       | down      |
| c29289     | --         | --        | --          | --        | 3.49        | up        |

3rd vs 4th: the comparison of third-instar and fourth-instar *B. odoriphaga*; 4th vs Pupa: the comparison of fourth-instar and pupal insects; 3rd vs Pupa: the comparison of third-instar and pupal insects; The “up” or “down” indicates the gene of latter one up-regulated or down-regulated compared with the former one. For example, “down” in “3rd vs 4th” indicates down-regulated in fourth-instar compared with third-instar stage.
