# Supplementary material for: Transcriptome Analysis and Discovery of Genes Relevant to Development in Bradysia odoriphaga at Three Developmental Stages
Source: PubMed Central journal article supplement (PMC4759360; doi:10.1371/journal.pone.0146812), 2016-02-18
Supplement: pone.0146812.s012.pdf [file pone.0146812.s012.pdf]

1

**Table S4. COG, KOG and KEGG annotation of differentially expressed genes (DEGs) related to *Bradysia odoriphaga* development**

| Unigene ID | COG annotation                        | KOG annotation                                             | KEGG annotation                           |
|------------|---------------------------------------|------------------------------------------------------------|-------------------------------------------|
| c4843      | Transcription                         | Transcription                                              | —                                         |
| c23897     | General function prediction only      | —                                                          | —                                         |
| c33601     | —                                     | Cell cycle control, cell division, chromosome partitioning | Apoptosis (Ko04210)                       |
| c20752     | —                                     | General function prediction only                           | —                                         |
| c23801     | —                                     | Signal transduction mechanisms                             | MAPK signaling pathway - fly (ko04013)    |
| c26961     | —                                     | General function prediction only                           | —                                         |
| c31327     | —                                     | Cell cycle control, cell division, chromosome partitioning | TGF-beta signaling pathway (ko04350)      |
| c4206      | —                                     | —                                                          | Endocytosis (ko04144)                     |
| c29289     | —                                     | Replication, recombination and repair                      | —                                         |
| c11110     | Carbohydrate transport and metabolism | —                                                          | —                                         |
| c29314     | —                                     | Energy production and conversion                           | Arginine and proline metabolism (ko00330) |
| c16124     | —                                     | General function prediction only                           | —                                         |
| c20905     | Amino acid transport and metabolism   | General function prediction only                           | —                                         |

2
