# Supplementary material for: Transcriptome Analysis and Discovery of Genes Relevant to Development in Bradysia odoriphaga at Three Developmental Stages
Source: PubMed Central journal article supplement (PMC4759360; doi:10.1371/journal.pone.0146812), 2016-02-18
Supplement: pone.0146812.s013.pdf [file pone.0146812.s013.pdf]

**Table S5. Subset of 45 differentially expressed genes (DEGs) selected in this study**

| Regulated type | Unigene ID | 3rd vs 4th |           | 4th vs Pupa |           | 3rd vs Pupa |           | NR annotation                                                |
|----------------|------------|------------|-----------|-------------|-----------|-------------|-----------|--------------------------------------------------------------|
|                |            | log2FC     | Regulated | log2FC      | Regulated | log2FC      | Regulated |                                                              |
| I              | c24076     | 2.07       | up        | 4.07        | up        | 6.36        | up        | no result                                                    |
|                | c31255     | 1.72       | up        | 3.22        | up        | 5.16        | up        | fatty acid synthase                                          |
|                | c15787     | -1.14      | down      | -5.16       | down      | -6.08       | down      | Rer1 protein                                                 |
|                | c22126     | -3.21      | down      | -8.78       | down      | -11.79      | down      | multiple inositol polyphosphate phosphatase                  |
| II             | c23128     | -1.09      | down      | -2.65       | down      | -3.53       | down      | reverse transcriptase-like protein                           |
|                | c29314     | -1.21      | down      | -3.58       | down      | -4.56       | down      | Nitric oxide synthase (NOS)                                  |
|                | c30388     | -3.77      | down      | -3.70       | down      | -7.26       | down      | no result                                                    |
|                | c10499     | -2.65      | down      | 5.33        | up        | 2.91        | up        | histone H2B                                                  |
| III            | c11110     | -6.56      | down      | 9.66        | up        | 3.33        | up        | probable H/ACA ribonucleoprotein complex subunit 1-like      |
|                | c28873     | -1.14      | down      | 8.58        | up        | 6.34        | up        | cytochrome P450, putative                                    |
|                | c11649     | 1.58       | up        | -13.98      | down      | -12.15      | down      | lipase                                                       |
|                | c11748     | 1.14       | up        | -4.64       | down      | -3.27       | down      | ribonuclease UK114-like                                      |
|                | c12361     | 3.68       | up        | -10.42      | down      | -6.52       | down      | no result                                                    |
|                | c14093     | 2.88       | up        | -14.70      | down      | -11.56      | down      | beta-1,4-endoglucanase                                       |
| IV             | c15398     | 1.22       | up        | -4.91       | down      | -3.47       | down      | cytochrome P450 2U1-like                                     |
|                | c15420     | 1.05       | up        | -10.48      | down      | -9.19       | down      | thioredoxin domain-containing protein 12-like isoform X2     |
|                | c15931     | 2.09       | up        | -13.62      | down      | -11.29      | down      | defensin                                                     |
|                | c16124     | 1.15       | up        | -14.55      | down      | -13.16      | down      | acidic endochitinase SP2-like                                |
|                | c16652     | 2.49       | up        | -6.11       | down      | -3.41       | down      | putative trypsin Inhibitor like cysteine rich domain protein |
|                | c17315     | 2.54       | up        | -10.65      | down      | -7.91       | down      | ecdysteroid regulated-like protein                           |

|        |      |    |        |      |        |      |                                               |
|--------|------|----|--------|------|--------|------|-----------------------------------------------|
| c18264 | 1.95 | up | -5.51  | down | -3.33  | down | cytochrome P450 CYP4D3v2                      |
| c19009 | 1.18 | up | -8.33  | down | -6.92  | down | multiple inositol polyphosphate phosphatase   |
| c19179 | 1.03 | up | -10.15 | down | -8.89  | down | puff B-2 protein                              |
| c19361 | 1.94 | up | -6.52  | down | -4.36  | down | hexamerin 2 beta                              |
| c19381 | 1.28 | up | -8.11  | down | -6.61  | down | phytanoyl-CoA dioxygenase, peroxisomal-like   |
| c20839 | 1.1  | up | -7.91  | down | -6.6   | down | alpha-amylase                                 |
| c20905 | 2.06 | up | -11.06 | down | -8.75  | down | glucose dehydrogenase                         |
| c21426 | 1.25 | up | -11.55 | down | -10.05 | down | acidic endochitinase SP2-like                 |
| c21548 | 1.74 | up | -11.28 | down | -9.31  | down | similar to metalloproteinase inhibitor 3      |
| c22526 | 1.23 | up | -3.77  | down | -2.32  | down | delta-5 desaturase                            |
| c22953 | 1.01 | up | -9.18  | down | -7.92  | down | AMP dependent ligase                          |
| c24446 | 1.08 | up | -11.87 | down | -10.53 | down | protease m1 zinc metalloprotease              |
| c24628 | 1.72 | up | -14.10 | down | -12.12 | down | beta-1,4-endoglucanase                        |
| c24808 | 1.13 | up | -11.21 | down | -9.84  | down | putative oxidase/oxidase                      |
| c26169 | 1.02 | up | -4.08  | down | -2.85  | down | sialin-like                                   |
| c26376 | 1.36 | up | -10.44 | down | -8.85  | down | pectate lyase                                 |
| c26581 | 1.29 | up | -9.59  | down | -8.05  | down | peroxidase-like isoform 2                     |
| c27111 | 1.28 | up | -6.76  | down | -5.26  | down | glutathione S-transferase                     |
| c27263 | 1.75 | up | -13.51 | down | -11.51 | down | carboxylesterase                              |
| c27821 | 3.69 | up | -7.59  | down | -3.68  | down | lipase                                        |
| c30916 | 1.88 | up | -9.40  | down | -7.28  | down | lysosomal alpha-mannosidase                   |
| c31983 | 1.68 | up | -10.69 | down | -8.78  | down | regucalcin-like                               |
| c4936  | 1.2  | up | -4.67  | down | -3.27  | down | fibrinogen C domain-containing protein 1-like |
| c8174  | 1.16 | up | -8.75  | down | -7.39  | down | Lipase family protein                         |
| c9832  | 1.63 | up | -8.10  | down | -6.24  | down | glutathione S-transferase 1-like              |

---

3rd vs 4th: the comparison of third-instar and fourth-instar *B. odoriphaga*; 3rd vs Pupa: the comparison of third-instar and pupal insects; 4th vs Pupa: the comparison of fourth-instar and pupal insects

1
